# Supplementary material for: Multi-stimuli-responsive induced chirality of polyoxometalates in natural polysaccharide hydrogels
Source: Royal Society of Chemistry journal article supplement (doi:10.1039/c9cc01981b), 2019-01-01
Supplement: c9cc01981b1.pdf [file c9cc01981b1.pdf]

## *Supporting Information*

### **Multi-stimuli-responsive induced circular dichroism of polyoxometalates in natural polysaccharide hydrogels**

Rong Wang, Xinhua Wan\* and Jie Zhang\*

Beijing National Laboratory for Molecular Science, Key Laboratory of Polymer Chemistry and Physics of Minister of Education, Center for Soft Matter Science and Engineering, College of Chemistry and Molecular Engineering, Peking University, Beijing 100871, China.

\*To whom correspondence should be addressed.

E-mail: xhwan@pku.edu.cn (X. H. W.) and jz10@pku.edu.cn (J. Z.)

#### **Experimental Section**

Agarose (molecular biology grade) was purchased from Alfa Aesar (China) Chemicals Co. Ltd.  $\kappa$ - / $\iota$ - carrageenan and sodium ascorbate (SA) were purchased from J&K Scientific Ltd. Commercially available Keggin POMs { $\text{H}_4[\text{SiO}_4\text{MO}_{12}\text{O}_{36}]$  ( $\text{SiMo}_{12}$ ),  $\text{H}_3\text{PMo}_{12}\text{O}_{40}$  ( $\text{PMo}_{12}$ ),  $\text{H}_4[\text{SiW}_{12}\text{O}_{40}]$  ( $\text{SiW}_{12}$ ),  $\text{H}_3\text{O}_{40}\text{PW}_{12}$  ( $\text{PW}_{12}$ )}, were purchased from Sinopharm Chemical Reagent Co. Ltd. Ultrapure water was used to prepare all aqueous solutions from a Millipore Milli-Q system. Potassium chloride and 30%  $\text{H}_2\text{O}_2$  solution were purchased from Beijing Chemical Works. All the reagent was used as received.  $\text{K}_6\text{P}_2\text{W}_{18}\text{O}_{62}$  ( $\text{P}_2\text{W}_{18}$ ) and  $(\text{NH}_4)_6[\text{P}_2\text{Mo}_{18}\text{O}_{62}] \cdot 12\text{H}_2\text{O}$  ( $\text{P}_2\text{Mo}_{18}$ ) were synthesized according to the published procedures.<sup>1,2</sup>

#### **Characterization.**

Absorption spectra were recorded on a Lambda 35 UV-Vis spectrometer. CD spectra were recorded on a Jasco J-810 circular dichroism spectrometer, and a circular quartz cell with a length of 2 mm or 0.2 mm was used for characterization. TEM images were recorded from a JEOL JEM-2100 (Japan) transmission electron microscopy operated at 200kV. Isothermal titration calorimetry experiment was taken in a MicroCal ITC200 apparatus at 25 °C. The POM aqueous solution (0.5689 mM) were titrated into a agarose,  $\iota$ -carrageenan,  $\kappa$ -carrageenan aqueous solutions (1.5mM) via a 280  $\mu\text{L}$  syringe, respectively. The total injection was 29 drops.

#### **Preparation of agarose hydrogel hybrids.**

In a typical experiment, 60 mg agarose powder was added to 3mL ultrapure water at 100°C and stirred vigorously 5 min. A certain amount of POMs was added to the above homogeneous solution and then cool down to room temperature to form hydrogel hybrid. (Agarose:  $c = 20 \text{ mg mL}^{-1}$ ;  $\text{PMo}_{12}$ :  $c = 5 \text{ mg mL}^{-1}$ ;  $\text{SiMo}_{12}$ :  $c = 5 \text{ mg mL}^{-1}$ ;  $\text{P}_2\text{Mo}_{18}$ :  $c = 1.5 \text{ mg mL}^{-1}$ )

#### **Preparation of carrageenan hydrogel hybrids.**

The procedure was similar to the agarose ones. 5 mg/ml  $\kappa$ - carrageenan and 15 mg/ml  $\iota$ - carrageenan were prepared at 90°C, and 150 mM KCl solution was added to hot solution to promote the conformational transition from random coil to helix. ( $\iota$ -carrageenan:  $c = 15 \text{ mg mL}^{-1}$ ;  $\kappa$ -carrageenan:  $c = 5 \text{ mg mL}^{-1}$ ; KCl:  $c = 150\text{mM}$ ;  $\text{PMo}_{12}$ :  $c = 5 \text{ mg mL}^{-1}$ ;  $\text{SiMo}_{12}$ :  $c = 5 \text{ mg mL}^{-1}$ ;  $\text{P}_2\text{Mo}_{18}$ :  $c = 1.5 \text{ mg mL}^{-1}$ ;  $\text{PW}_{12}$ :  $c = 3 \text{ mg mL}^{-1}$ ;  $\text{SiW}_{12}$ :  $c = 3 \text{ mg mL}^{-1}$ ;  $\text{P}_2\text{W}_{18}$ :  $c = 1.5 \text{ mg mL}^{-1}$ )

For the control hydrogel hybrids, no POMs was added.

### Preparation of hydrogel hybrids tuning by external conditions.

We selected  $\kappa$ -carrageenan hydrogel hybrids as an example. ( $\kappa$ -carrageenan:  $c = 5 \text{ mg mL}^{-1}$ ; KCl:  $c = 150 \text{ mM}$ ;  $\text{SiMo}_{12}$ :  $c = 3 \text{ mg mL}^{-1}$ )

### Supplementary Figures and Tables

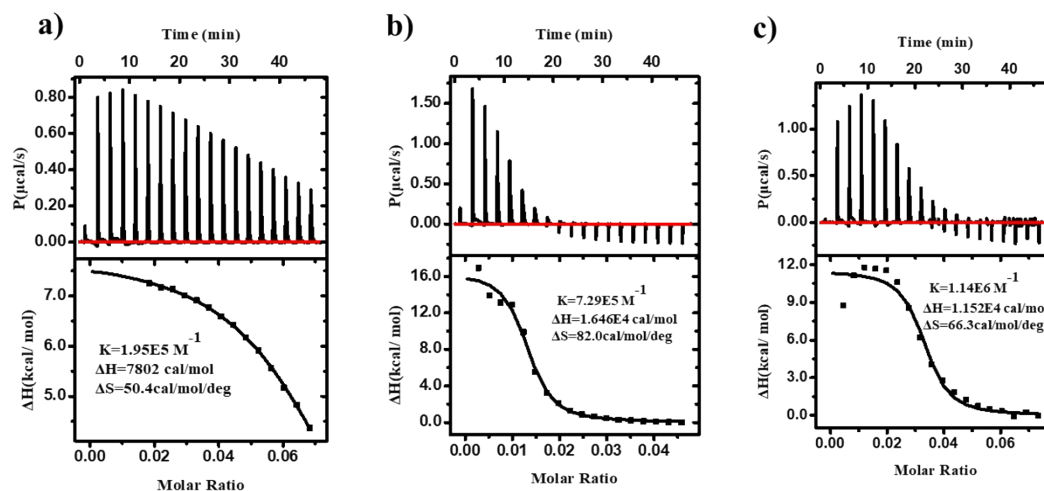

**Fig. S1** Isothermal titration calorimetry data of the addition of the  $\text{P}_2\text{Mo}_{18}$  aqueous solution into the agarose (a),  $\iota$ -carrageenan (b),  $\kappa$ -carrageenan (c) aqueous solutions at  $25^\circ\text{C}$ .

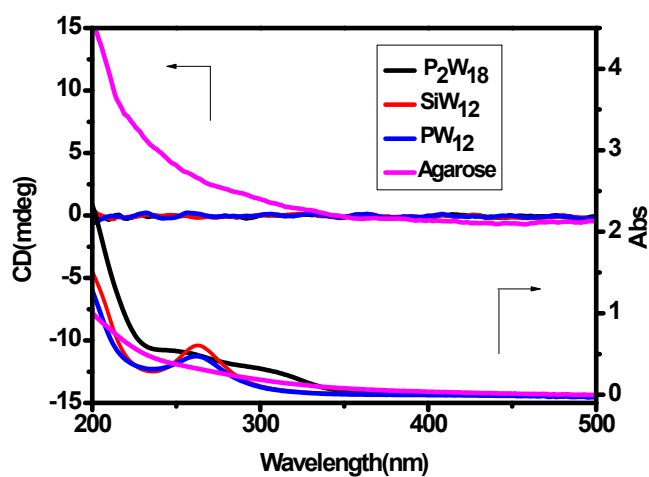

**Fig. S1S2** UV-Vis spectra and CD spectra of pure polyoxotungstates and agarose.

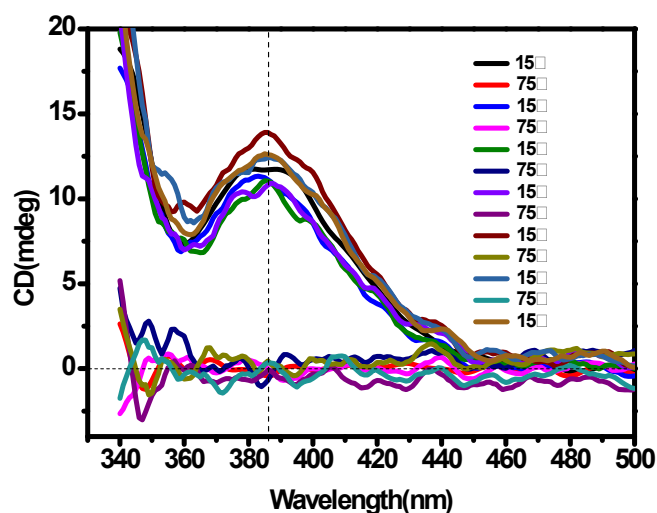

**Fig. S3** The reversible CD spectra of SiMo<sub>12</sub>/κ-carrageenan hybrids at different temperature between 15°C and 75°C.

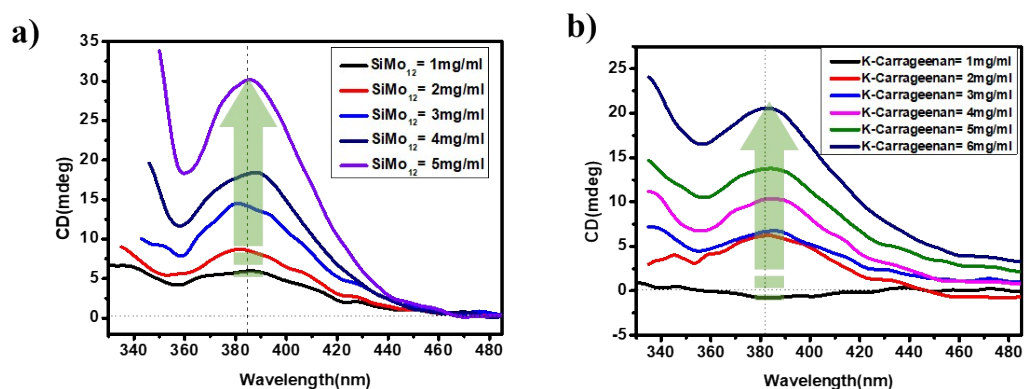

**Fig. S4** CD spectra of SiMo<sub>12</sub>/κ-carrageenan hybrids with different concentration of SiMo<sub>12</sub> (a), κ-carrageenan (b).

## References

- 1 L. E. Briand, G. M. Valle and H. J. Thomas, *J. Mater. Chem.*, 2002, **12**, 299.
- 2 C. R. Graham and R. G. Finke, *Inorg. Chem.*, 2008, **47**, 3679.
